# Supplementary material for: The Eyelid Angiosarcoma: A Systematic Review of Characteristics and Clinical Course
Source: MDPI journal article supplement (doi:10.3390/jcm11144204), 2022-07-20
Supplement: s1 [file s1]

**Supplementary Table S2.** Critical appraisal checklist of case reports included in the analysis.

| Study              | Demographic Characteristics* | Clinical History | Clinical Condition on Presentation | Diagnostic Tests | Treatment | Post Intervention Conditions | Adverse Events | Takeaway Lessons |
|--------------------|------------------------------|------------------|------------------------------------|------------------|-----------|------------------------------|----------------|------------------|
| De Schweinitz [5]  | Yes                          | Yes              | Yes                                | Yes              | Yes       | Yes                          | No             | Yes              |
| Mackenzie [6]      | Unclear                      | Yes              | Yes                                | Yes              | Yes       | Yes                          | No             | Yes              |
| Panizzon [7]       | Yes                          | Yes              | Yes                                | Yes              | Yes       | Yes                          | No             | Yes              |
| Bray [8]           | Yes                          | Yes              | Yes                                | Yes              | Yes       | Yes                          | No             | Yes              |
| Lapidus [9]        | Unclear                      | Yes              | Yes                                | Yes              | Yes       | Yes                          | No             | No               |
| Gunduz [10]        | Unclear                      | Yes              | Yes                                | Yes              | Yes       | Yes                          | No             | Yes              |
| Mehrens [11]       | Unclear                      | Yes              | Yes                                | Yes              | Yes       | Yes                          | No             | Yes              |
| Tay [12]           | Yes                          | Yes              | Yes                                | Yes              | Yes       | Yes                          | No             | Yes              |
| Conway [13]        | Yes                          | Yes              | Yes                                | Yes              | Yes       | Yes                          | No             | Yes              |
| Hiemstra [14]      | Yes                          | Yes              | Yes                                | Yes              | Yes       | Yes                          | No             | Yes              |
| Kikuchi [15]       | Yes                          | Yes              | Yes                                | Yes              | Yes       | Yes                          | No             | Yes              |
| Miura [16]         | Yes                          | Yes              | Yes                                | Yes              | Yes       | No                           | No             | Yes              |
| De Keizer [17]     | Unclear                      | Yes              | Yes                                | Yes              | Yes       | Yes                          | No             | Yes              |
| Mitra [18]         | Yes                          | Yes              | Yes                                | Yes              | Yes       | Yes                          | No             | Yes              |
| Sluzevich [19]     | Yes                          | Yes              | Yes                                | Yes              | Yes       | Yes                          | No             | Yes              |
| Fuller [20]        | No                           | Yes              | Yes                                | Yes              | Yes       | Yes                          | No             | Yes              |
| Papalas [21]       | Yes                          | Yes              | Yes                                | Yes              | Yes       | Yes                          | No             | Yes              |
| Wiwatwongwana [22] | Yes                          | Yes              | Yes                                | Yes              | Yes       | Yes                          | No             | Yes              |
| Lee [23]           | Yes                          | Yes              | Yes                                | Yes              | Yes       | No                           | No             | Yes              |
| Ambujam [24]       | Unclear                      | Yes              | Yes                                | Yes              | Yes       | No                           | No             | Yes              |
| Choi [25]          | Yes                          | Yes              | Yes                                | Yes              | Yes       | Yes                          | No             | Yes              |
| Cox [26]           | Unclear                      | Yes              | Yes                                | Yes              | Yes       | Yes                          | No             | Yes              |
| Demirci [27]       | Unclear                      | Yes              | Yes                                | Yes              | Yes       | Yes                          | No             | Yes              |
| Karkouche [28]     | Unclear                      | Yes              | Yes                                | Yes              | Yes       | Yes                          | No             | Yes              |
| Dempsey [29]       | Yes                          | Yes              | Yes                                | Yes              | Yes       | Yes                          | No             | Yes              |
| Kim [30]           | Yes                          | Yes              | Yes                                | Yes              | Yes       | No                           | No             | Yes              |
| Lemanski [31]      | Unclear                      | Yes              | Yes                                | Yes              | Yes       | Yes                          | No             | Yes              |
| Benmously [32]     | Unclear                      | Yes              | Yes                                | Yes              | Yes       | Yes                          | No             | Yes              |
| Huang [33]         | Unclear                      | Yes              | Yes                                | Yes              | Yes       | Yes                          | No             | Yes              |
| Hamill [34]        | Unclear                      | Yes              | Yes                                | Yes              | Yes       | No                           | No             | Yes              |
| Ferguson [35]      | Unclear                      | Yes              | Yes                                | Yes              | Yes       | Yes                          | No             | Yes              |
| Milman [36]        | Yes                          | Yes              | Yes                                | Yes              | Yes       | No                           | No             | Yes              |

\*Demographic characteristics includes age, sex and race.
