# Supplementary material for: The Eyelid Angiosarcoma: A Systematic Review of Characteristics and Clinical Course
Source: MDPI journal article supplement (doi:10.3390/jcm11144204), 2022-07-20
Supplement: s1 [file s1]

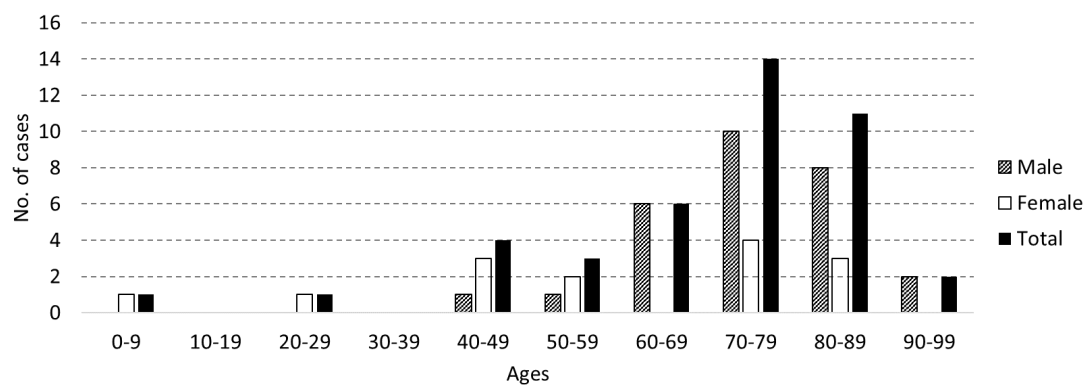

**Figure S1.** Age and sex distribution of eyelid angiosarcoma.

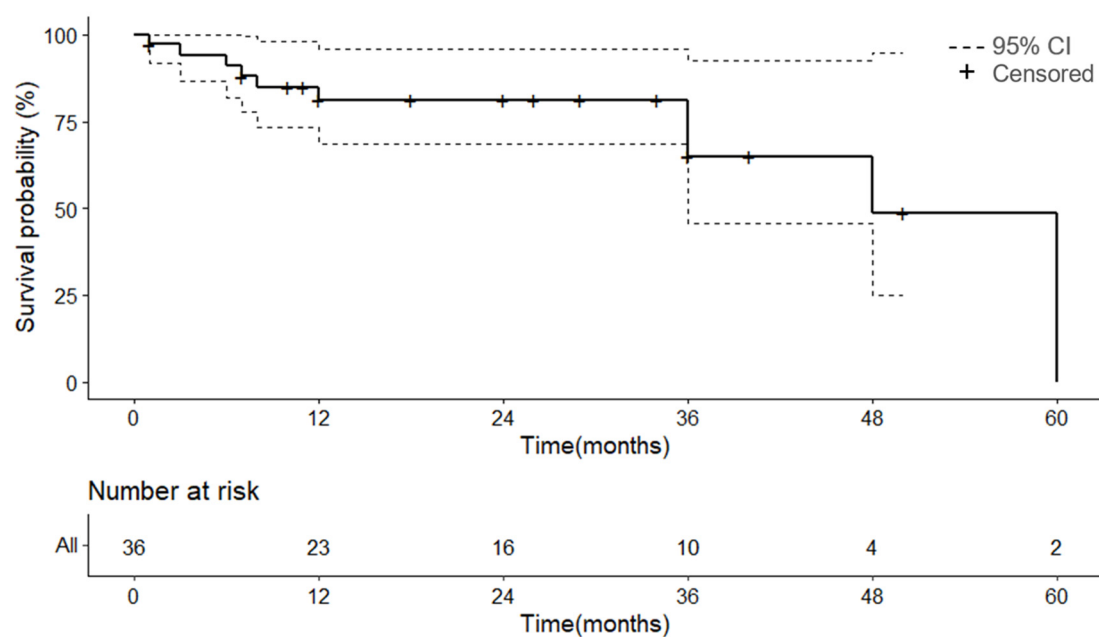

**Figure S2.** Survival probability of patients with eyelid angiosarcoma.
